# Supplementary material for: Multicentre Surveillance of Candida Species from Blood Cultures during the SARS-CoV-2 Pandemic in Southern Europe (CANCoVEU Project)
Source: MDPI journal article supplement (doi:10.3390/microorganisms11030560), 2023-02-23
Supplement: s1 [file s1]

**Table S1.** Candida species identification and susceptibility results methods according to hospital center.

| Hospital Centre                                   | Country          | Hospital beds | <i>Candida</i> species identification method | <i>Candida</i> species susceptibility results method                                              | Clinical breakpoints interpretation |
|---------------------------------------------------|------------------|---------------|----------------------------------------------|---------------------------------------------------------------------------------------------------|-------------------------------------|
| Città della Salute e della Scienza di Torino      | Turin, Italy     | 1,900         | MALDI Biotyper®<br>Bruker                    | MICRONAUT-AM Antifungal Agents MIC,<br>MERLIN Diagnostika GmbH Systems                            | EUCAST                              |
| Centro Hospitalar Universitário de Lisboa Central | Lisbon, Portugal | 1,300         | Vitek MS,<br>Biomérieux                      | Etest, Biomérieux                                                                                 | EUCAST                              |
| Hospital Universitario La Paz                     | Madrid, Spain    | 1,200         | MALDI Biotyper®<br>Bruker                    | Sensititre™ YeastOne™, TREK Diagnostic Systems                                                    | CLSI                                |
| University Hospital of Ioannina                   | Ioannina, Greece | 845           | Vitek 2, Biomérieux                          | Vitek 2, Biomérieux                                                                               | CLSI                                |
| Policlinico Universitario Paolo Giaccone          | Palermo, Italy   | 530           | MALDI Biotyper®<br>Bruker                    | Sensititre™ YeastOne™, TREK Diagnostic Systems<br>Etest, Biomérieux<br>Disc diffusion, Liofilchem | CLSI                                |
| Nicosia General Hospital                          | Nicosia, Cyprus  | 450           | Vitek 2, Biomérieux                          | Vitek 2, Biomérieux                                                                               | EUCAST                              |

**Table S2.** Proportion per year and comparison of distribution of *Candida* species isolates according to hospital ward.

| <i>Candida</i> species         | Emergency % (n) |                  | Medical ward % (n) |                  | Surgical ward % (n) |                  |
|--------------------------------|-----------------|------------------|--------------------|------------------|---------------------|------------------|
|                                | 2020<br>n=13    | 2021<br>n=19     | 2020<br>n=142      | 2021<br>n=118    | 2020<br>n=76        | 2021<br>n=85     |
| <i>C. albicans</i>             | 38.5 (5)        | 52.6 (10)        | 40.9 (58)          | 45.8 (54)        | 39.5 (30)           | <b>56.4</b> (48) |
| <i>C. parapsilosis</i> complex | 7.7 (1)         | 15.8 (3)         | 38.7 (55)          | 29.7 (35)        | 36.8 (28)           | <b>20</b> (17)   |
| <i>C. glabrata</i>             | 38.5 (5)        | 15.8 (3)         | 10.6 (15)          | <b>20.3</b> (24) | 13.2 (10)           | 15.3 (13)        |
| <i>C. tropicalis</i>           | 15.3 (2)        | 10.5 (2)         | 7.7 (11)           | 2.5 (3)          | 7.9 (6)             | 5.9 (5)          |
| <i>C. krusei</i>               | -               | 5.3 (1)          | -                  | 1.7 (2)          | -                   | -                |
| <i>C. guilliermondii</i>       | -               | -                | -                  | -                | 1.3 (1)             | 2.4 (2)          |
| <i>C. lusitaniae</i>           | -               | -                | 0.7 (1)            | -                | 1.3 (1)             | -                |
| <i>C. dubliniensis</i>         | -               | -                | 1.4 (2)            | -                | -                   | -                |
| <i>Candida</i> species         | ICU % (n)       |                  | COVID-19 ICU % (n) |                  | COVID-19 ward % (n) |                  |
|                                | 2020<br>n=103   | 2021<br>n=73     | 2020<br>n=38       | 2021<br>n=58     | 2020<br>n=8         | 2021<br>n=12     |
| <i>C. albicans</i>             | 35.9 (37)       | <b>50.7</b> (37) | 57.9 (22)          | 41.4 (24)        | 50 (4)              | 58.3 (7)         |
| <i>C. parapsilosis</i> complex | 45.6 (47)       | <b>23.3</b> (17) | 26.3 (10)          | 34.5 (20)        | 25 (2)              | 16.7 (2)         |
| <i>C. glabrata</i>             | 12.6 (13)       | 15.1 (11)        | 10.6 (4)           | 5.2 (3)          | 25 (2)              | 16.7 (2)         |
| <i>C. tropicalis</i>           | 1 (1)           | 2.7 (2)          | 2.6 (1)            | 10.3 (6)         | -                   | 8.3 (1)          |
| <i>C. krusei</i>               | 3 (3)           | 6.9 (5)          | -                  | 5.2 (3)          | -                   | -                |
| <i>C. guilliermondii</i>       | 1.9 (2)         | -                | -                  | 3.4 (2)          | -                   | -                |

|                        |   |         |         |   |   |   |
|------------------------|---|---------|---------|---|---|---|
| <i>C. lusitaniae</i>   | - | 1.3 (1) | 2.6 (1) | - | - | - |
| <i>C. dubliniensis</i> | - | -       | -       | - | - | - |

---

Abbreviations: ICU: Intensive Care Unit. Numbers in bold indicate statistically significant difference ( $p \leq 0.05$ ).

**Table S3.** Azole and echinocandin resistance per year according to hospital ward.

| Antifungal resistance | Emergency % (n) |              | Medical ward % (n) |               | Surgical ward % (n) |              |
|-----------------------|-----------------|--------------|--------------------|---------------|---------------------|--------------|
|                       | 2020            | 2021         | 2020               | 2021          | 2020                | 2021         |
| Fluconazole % (n)     | - (0/13)        | 15.8 (3/19)  | 8 (11/137)         | 10.3 (12/117) | 6.8 (5/73)          | 14.3 (11/77) |
| Voriconazole % (n)    | - (0/9)         | 6.3 (1/16)   | 3.8 (5/131)        | 1.9 (2/105)   | 4.2 (3/71)          | 7.7 (6/78)   |
| Echinocandin % (n)    | 9.1 (1/11)      | 6.3 (1/16)   | 0.8 (1/121)        | 1.1 (1/95)    | 4.8 (3/62)          | 1.5 (1/66)   |
|                       | ICU % (n)       |              | COVID-19 ICU % (n) |               | COVID-19 ward % (n) |              |
|                       | 2020            | 2021         | 2020               | 2021          | 2020                | 2021         |
| Fluconazole % (n)     | 24.7 (24/97)    | 23.2 (16/69) | 5.3 (2/38)         | 14 (8/57)     | - (0/8)             | - (0/12)     |
| Voriconazole % (n)    | 6.5 (6/92)      | 7.5 (5/67)   | - (0/37)           | 1.9 (1/53)    | - (0/8)             | - (0/12)     |
| Echinocandin % (n)    | 1.3 (1/79)      | 1.7 (1/58)   | - (0/33)           | 5.8 (3/52)    | - (0/7)             | - (0/13)     |

Numbers in bold indicate statistically significant difference between 2020 and 2021 ( $p \leq 0.05$ ).
